# Supplementary material for: The NFIB‐ERO1A axis promotes breast cancer metastatic colonization of disseminated tumour cells
Source: PubMed Central journal article supplement (PMC8033524; doi:10.15252/emmm.202013162), 2021-03-10
Supplement: EMMM-13-e13162-s002.pdf [file EMMM-13-e13162-s002.pdf]

## Expanded View Figures

**Figure EV1. *In vivo* unbiased transposon screen in the non-metastatic *PIK3CA*<sup>H1047R</sup> mammary tumour-derived cells allows the isolation of aggressive lung metastatic lines.**

- A Kaplan–Meier plot depicting tumour incidence in NOD/SCID animals inoculated in the mammary fat pad with  $10^6$  cells of HR1. Ctrl ( $n = 14$ ) or HR1. PB cells ( $n = 19$ ), two-tailed log-rank test.
- B Representative bioluminescence acquisition of lungs from mice injected with HR1. PB or HR1. Ctrl cells as in A.
- C Graph representing the kinetics of HR1. Ctrl ( $n = 5$ ), HR1. PB ( $n = 4$ ), HR1. LM1 ( $n = 6$ ), HR1. LM3 ( $n = 5$ ), HR1. LM4 ( $n = 6$ ), HR1. LM5 ( $n = 5$ ), HR1. LM6 ( $n = 4$ ), and HR1. LM9 ( $n = 8$ ) tumour growth upon orthotopic injection of  $250 \times 10^3$  cells in NOD/SCID mice, means  $\pm$  s.d.
- D Bar graph showing tumour volumes in mice injected with HR1. Ctrl ( $n = 5$ ), HR1. PB ( $n = 4$ ), HR1. LM1 ( $n = 6$ ), HR1. LM3 ( $n = 5$ ), HR1. LM4 ( $n = 6$ ), HR1. LM5 ( $n = 5$ ), HR1. LM6 ( $n = 4$ ), or HR1. LM9 ( $n = 8$ ), means  $\pm$  s.d.
- E Kaplan–Meier plot showing metastasis onset after tumour removal in mice injected with HR1. Ctrl ( $n = 6$ ), HR1. PB ( $n = 8$ ), HR1. LM1 ( $n = 5$ ), HR1. LM3 ( $n = 3$ ), HR1. LM4 ( $n = 5$ ), HR1. LM5 ( $n = 3$ ), HR1. LM6 ( $n = 7$ ), or HR1. LM9 ( $n = 7$ ).
- F Bar graph showing metastatic incidence after tumour removal in mice injected with HR1. Ctrl ( $n = 6$ ), HR1. PB ( $n = 8$ ), HR1. LM1 ( $n = 5$ ), HR1. LM3 ( $n = 3$ ), HR1. LM4 ( $n = 5$ ), HR1. LM5 ( $n = 3$ ), HR1. LM6 ( $n = 7$ ), or HR1. LM9 ( $n = 7$ ).
- G Representative bioluminescence images (left panel) and bar plot quantification (right panel) of lung metastases after primary tumour removal in mice injected with metastatic or non-metastatic LM cells.  $n = 3$  mice, means  $\pm$  s.d., two-tailed Student's *t*-test.

Source data are available online for this figure.

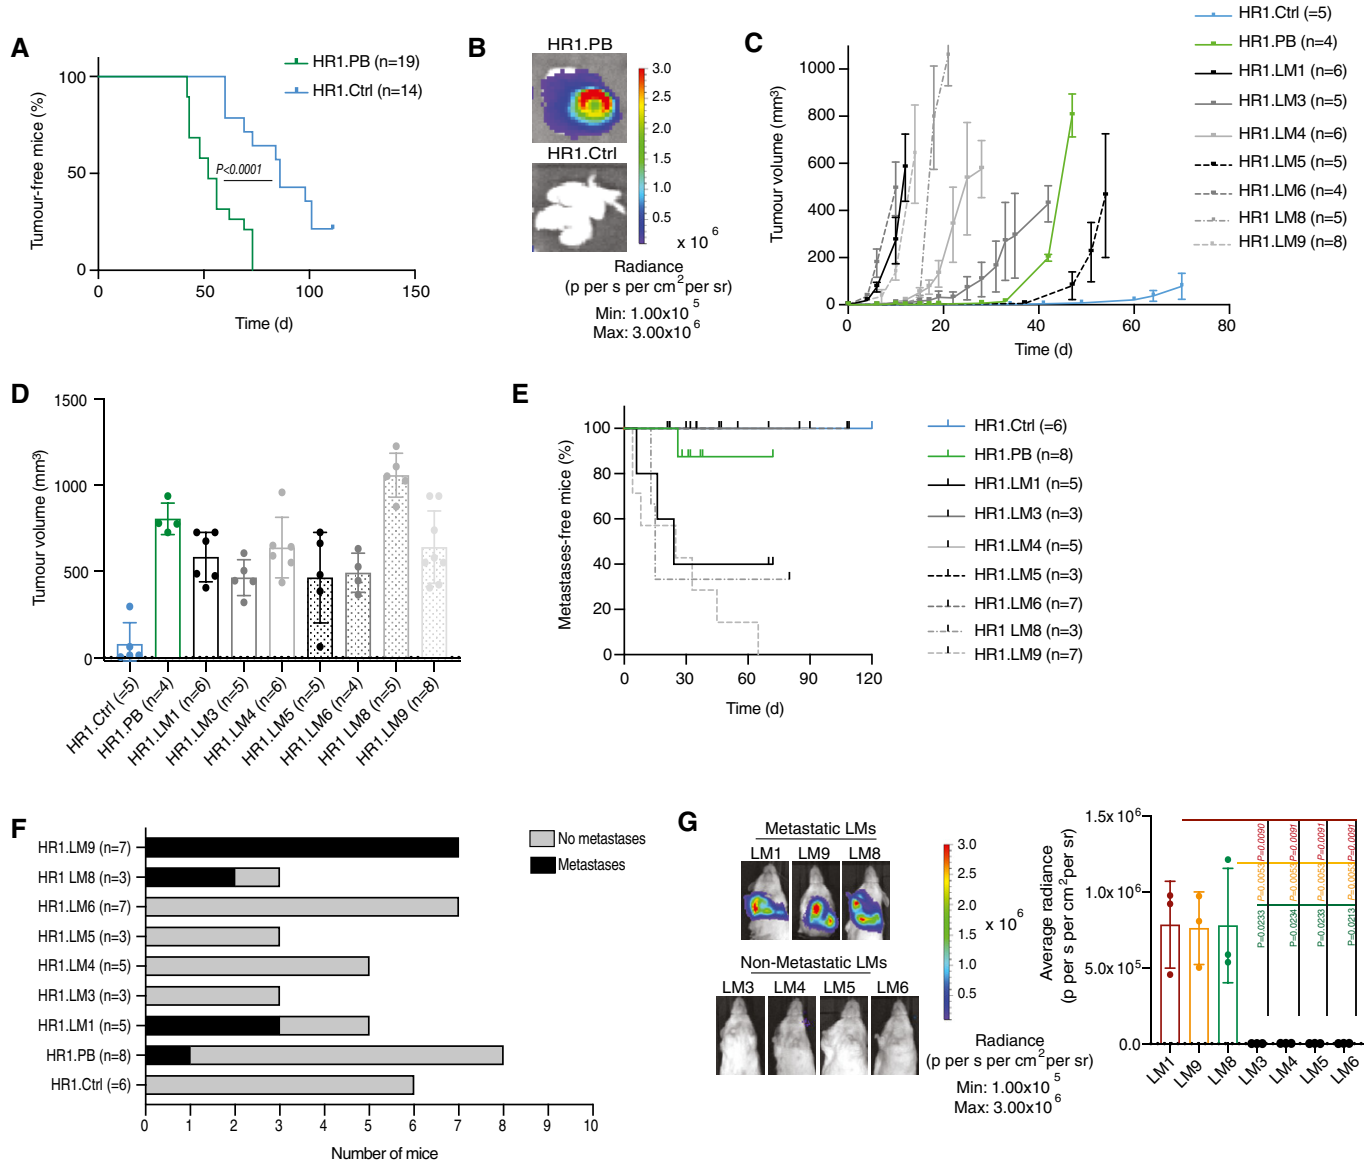

Figure EV1.

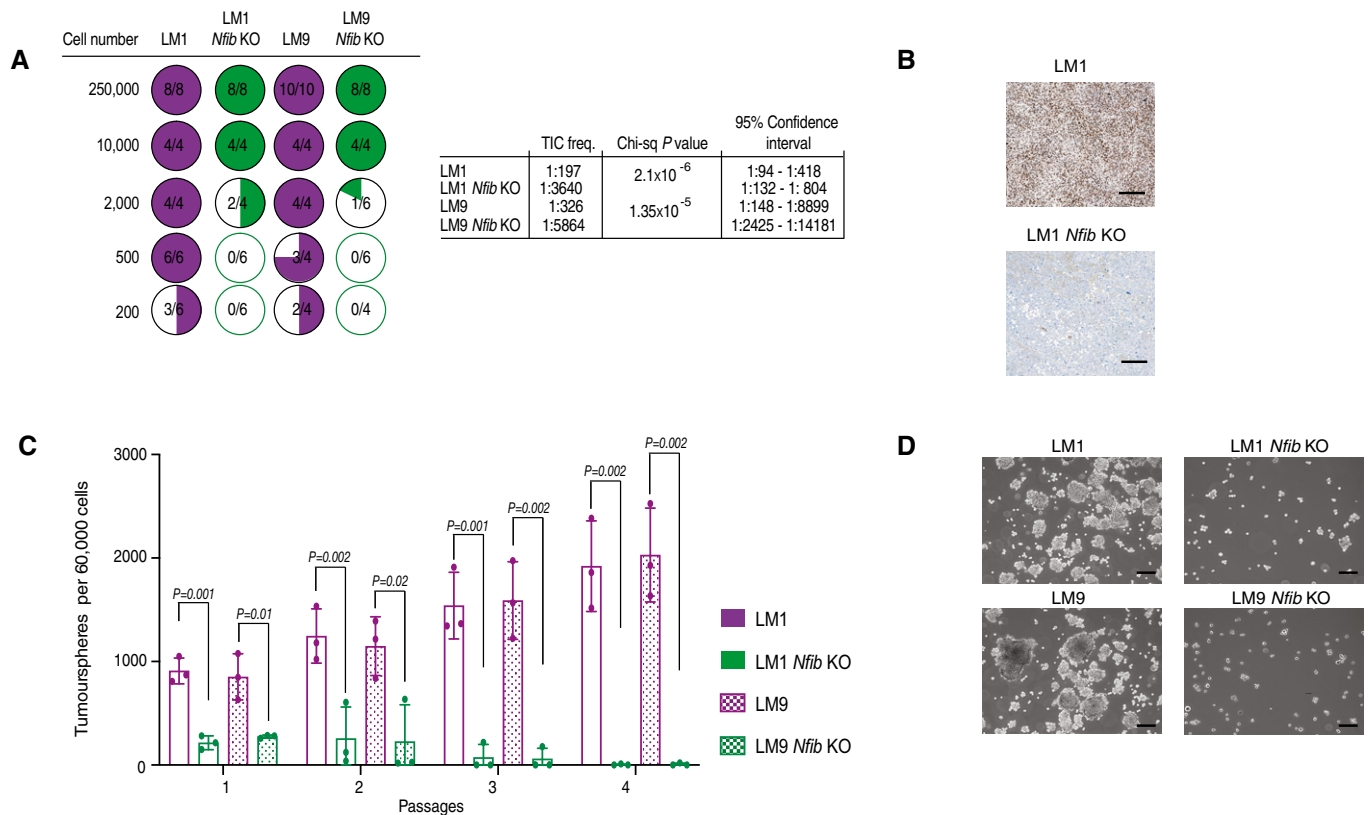

**Figure EV2. *Nfib* overexpression accelerates tumour growth.**

- A Limiting dilution assay: (left panel) quantification of tumour initiation upon orthotopic injection of mice with LM1, LM9, LM1 *Nfib* KO or LM9 *Nfib* KO cells. (right panel) Tumour-initiating cell (TIC) frequencies and 95% confidence intervals were calculated using ELDA (Hu & Smyth, 2009) as described in the experimental procedures.
- B Representative images of immunostaining for NFIB of tumours from mice injected with LM or LM *Nfib* KO cancer cells. Scale bar 100  $\mu$ m.
- C Bar graph showing tumoursphere numbers over four passages of LM1, LM9, LM1 *Nfib* KO, and LM9 *Nfib* KO,  $n = 3$  biological replicates and  $n = 3$  technical replicates, means  $\pm$  s.d., two-tailed Student's *t*-test.
- D Representative images of tumourspheres of LM1, LM9, LM1 *Nfib* KO, and LM9 *Nfib* KO cancer cell lines at the first passage. Scale bar 100  $\mu$ m.

Source data are available online for this figure.

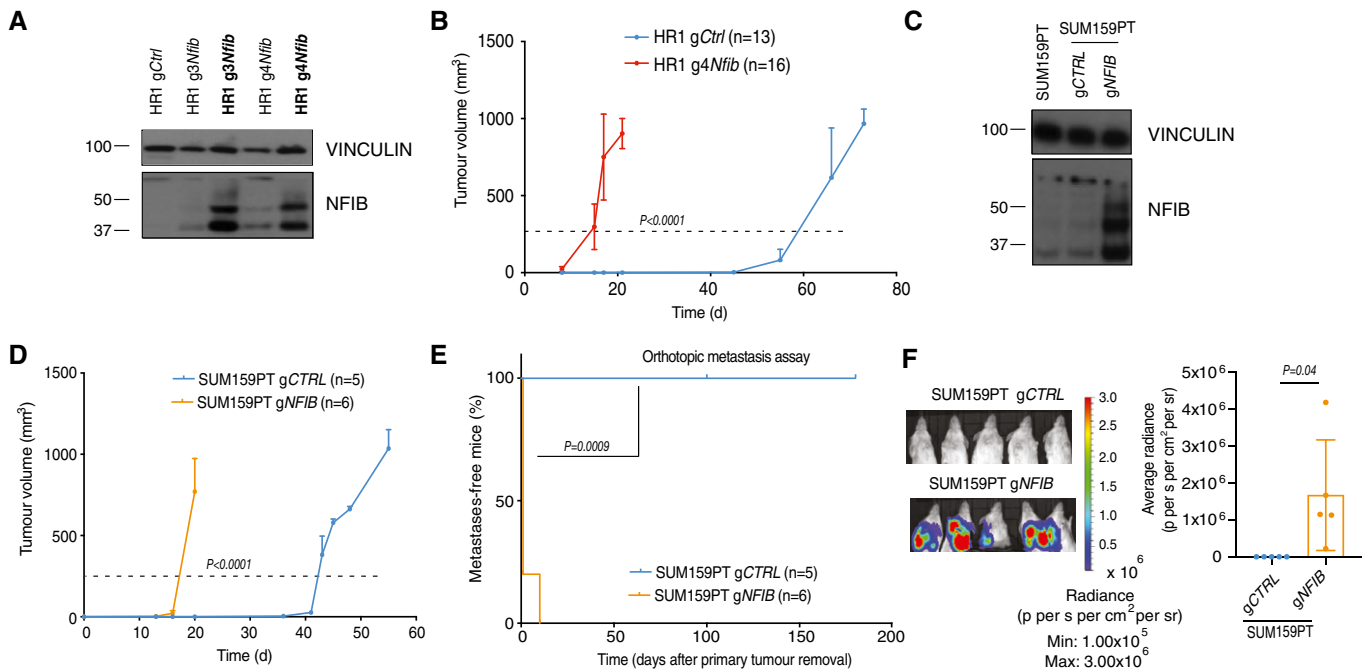

**Figure EV3. Endogenous *Nfib*/*NFIB* overexpression in HR1 and SUM159PT cell lines decreases tumour latency and enhances metastasis.**

- A Immunoblot showing proteins levels of NFIB in HR1 cells overexpressing *Nfib* via the CRISPR-Cas 9 SAM system. In bold: cell lines after two months of culture *in vitro*. HR1 *g4Nfib* cells were selected for further studies. VINCULIN served as a loading control.
- B Graph representing the kinetics of HR1 *gCtrl* ( $n = 13$ ) and HR1 *g4Nfib* ( $n = 16$ ) tumour growth upon orthotopic injection of  $250 \times 10^3$  cells in NOD/SCID mice. Curves show means of tumour volume  $\pm$  s.d., two-tailed Student's *t*-test on the times to reach  $250 \text{ mm}^3$  (dashed line).
- C Immunoblots showing protein levels of NFIB in SUM159PT cells overexpressing *NFIB* via the CRISPR-Cas 9 SAM system. VINCULIN served as a loading control.
- D Graph representing the kinetics of SUM159PT *gCTRL* ( $n = 5$ ) and *gNFIB* ( $n = 6$ ) tumour growth upon orthotopic injection of  $250 \times 10^3$  cells into NSG mice. Curves show means of tumour volume  $\pm$  s.d., two-tailed Student's *t*-test on the times to reach  $250 \text{ mm}^3$  (dashed line).
- E Kaplan–Meier plot depicting metastasis onset after tumour removal from mice injected orthotopically with SUM159PT *gCTRL* ( $n = 5$ ) or *gNFIB* ( $n = 6$ ), two-tailed log-rank test.
- F Representative bioluminescence images (left panel) and quantification (right panel) of lung metastases at 30 (SUM159PT *gCTRL*) and 3 (SUM159PT *gNFIB*) days after primary tumour removal.  $n = 5$  mice, means  $\pm$  s.d., two-tailed Student's *t*-test.

Source data are available online for this figure.

**Figure EV4. The NFIB-ERO1A-VEGFA axis promotes lung metastatic colonization through angiogenesis.**

- A Representative images of VEGFA-stained tumours. Scale bar, 1 mm.
- B Bar graph showing quantification of VEGFA staining in the tumours. Means  $\pm$  s.d.,  $n = 2$ , two-tailed Student's *t*-test.
- C Left panel: Representative images of VEGFA-positive lung metastases. Scale bar, 1 mm. Right panel: Bar graph showing quantification of VEGFA. Means  $\pm$  s.d.,  $n = 4$  SUM159PT *gNFIB* shCTRL,  $n = 4$  sh1 *ERO1A*, and  $n = 4$  sh2 *ERO1A*, two-tailed Student's *t*-test.
- D Left panel: Representative images of VEGFA-positive lung metastases. Scale bar, 1 mm. Right panel: Bar graph showing quantification of VEGFA. Means  $\pm$  s.d.,  $n = 5$  HR1 *g4Nfib* and LM1 shCTRL,  $n = 5$  sh1 *ERO1A*, and  $n = 5$  sh2 *ERO1A*, two-tailed Student's *t*-test.
- E Representative image of CD31-positive endothelial structures in tumours. Scale bar, 1 mm.
- F Bar graph showing quantification of CD31 staining in tumours. Means  $\pm$  s.d.,  $n = 2$ , two-tailed Student's *t*-test.
- G Left panel: Representative images of CD31-positive endothelial structures in lung metastases. Scale bar, 1 mm. Right panel: Bar graphs showing quantification of metastases as percentage of metastatic area per lung and quantification of CD31 staining in the metastatic area. Means  $\pm$  s.d.,  $n = 6$  HR1 *gCtrl* and  $n = 6$  HR1 *g4Nfib*, two-tailed Student's *t*-test.

Source data are available online for this figure.

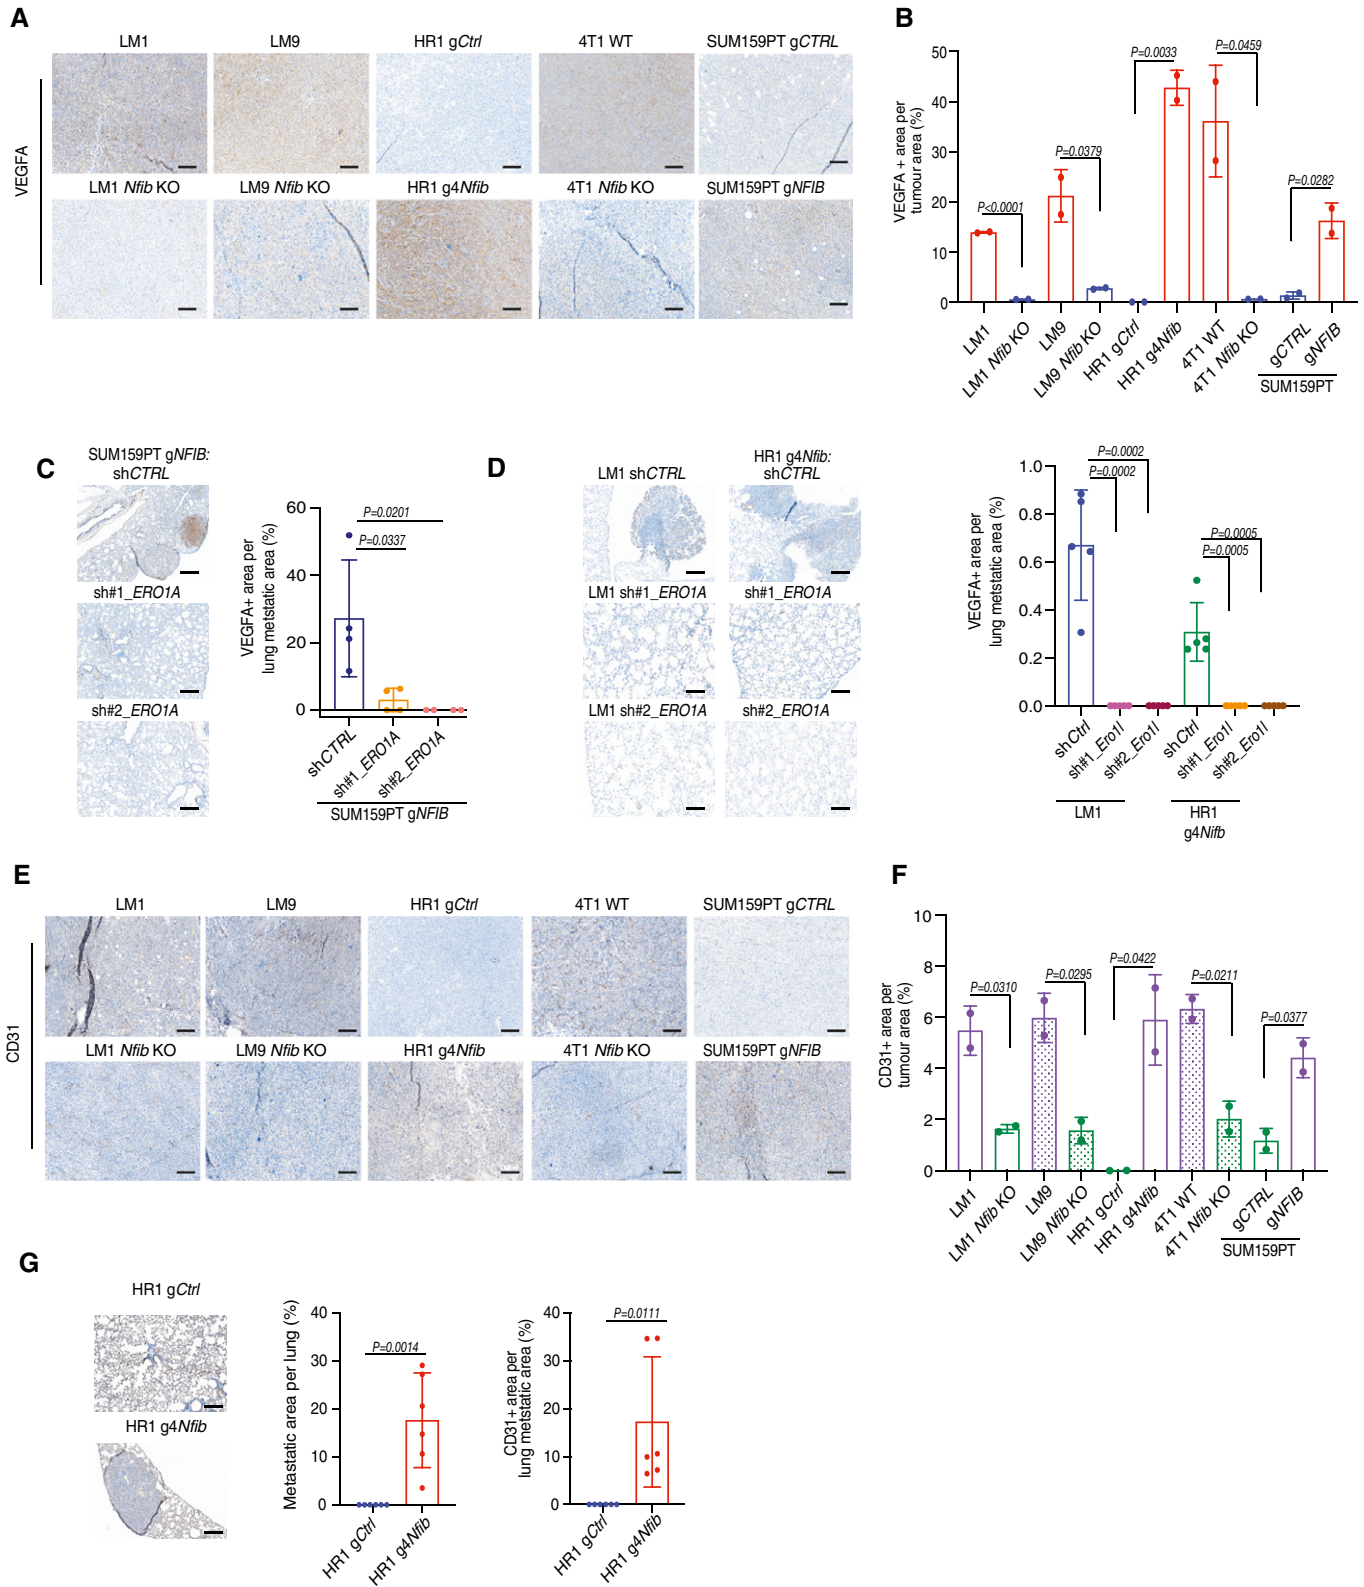

Figure EV4.

**Figure EV5. *Ero1l* overexpression in *Nfib* KO cells restores *Vegfa* expression and metastasis.**

- A Bar graph representing mean *Ero1l* mRNA expression in the LM1, LM9, 4T1 WT with respective *Nfib* KO cell lines and *Ero1l* overexpression (OE) as indicated. Means  $\pm$  s.d.,  $n = 2$  biological replicates and  $n = 2$  technical replicates, two-tailed Student's *t*-test, FC = fold change.
- B Kaplan–Meier survival analysis of NOD/SCID mice inoculated *i.v.* with LM1 *Nfib* KO ( $n = 6$ ), LM1 *Nfib* KO *Ero1l* OE ( $n = 6$ ), LM9 *Nfib* KO ( $n = 6$ ) or LM9 *Nfib* KO *Ero1l* OE ( $n = 6$ ) cells. Two-tailed log-rank test.
- C Representative bioluminescence images (left panel) and quantification (right panel) of lung metastases 5 days after *i.v.* injection of LM1 *Nfib* KO ( $n = 4$ ) or LM1 *Nfib* KO *Ero1l* OE ( $n = 4$ ) cells, means  $\pm$  s.d., two-tailed Student's *t*-test.
- D Bar graph representing mean *Vegfa* mRNA expression in the LM1, LM9, 4T1 WT with respective *Nfib* KO cell lines and *Ero1l* overexpression. Means  $\pm$  s.d.,  $n = 2$  biological replicates and  $n = 2$  technical replicates, two-tailed Student's *t*-test, FC = fold change.
- E Left panel: Representative images of VEGFA-positive lung metastases. Scale bar, 1 mm. Right panel: Bar graph showing quantification of VEGFA staining in the metastatic area. Means  $\pm$  s.d.,  $n = 5$  LM1/LM9 *Nfib* KO and LM1/LM9 *Nfib* KO *Ero1l* OE, two-tailed Student's *t*-test.

Source data are available online for this figure.

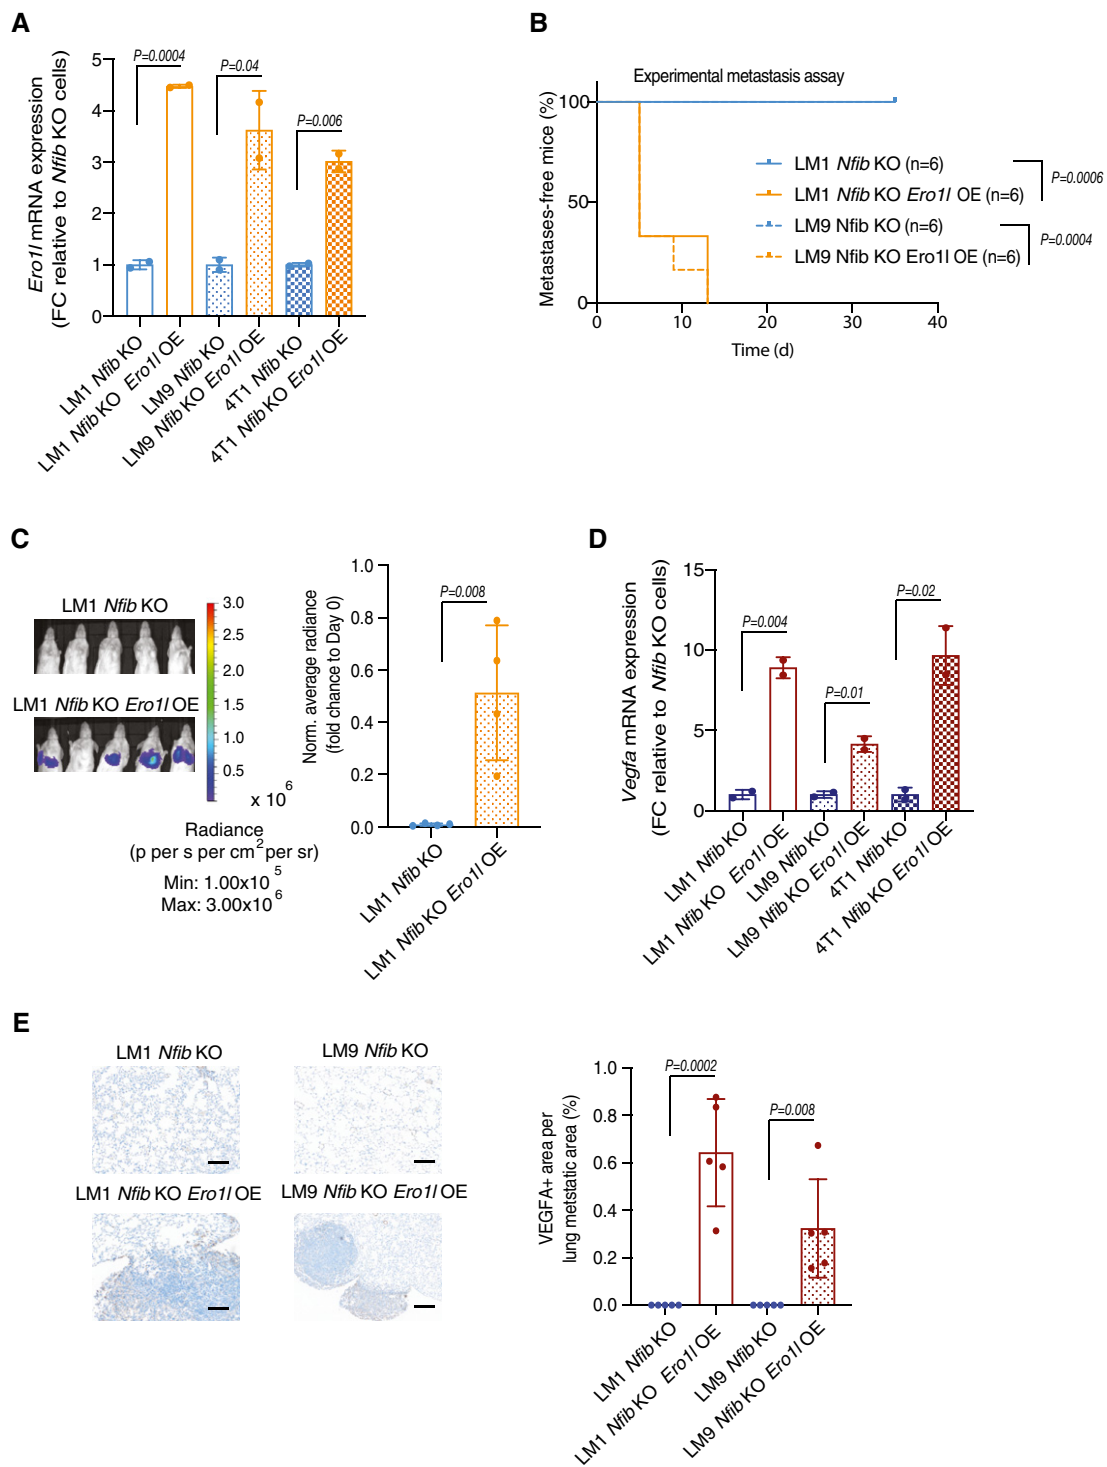

Figure EV5.
